# Supplementary material
Source: publisher site journal article supplement (https://www.dovepress.com/article/452824)

**Figure S1 Identification of mouse bone marrow MSCs.** Representative fluorescence images of MSCs. (red: CD44, blue: nuclei).


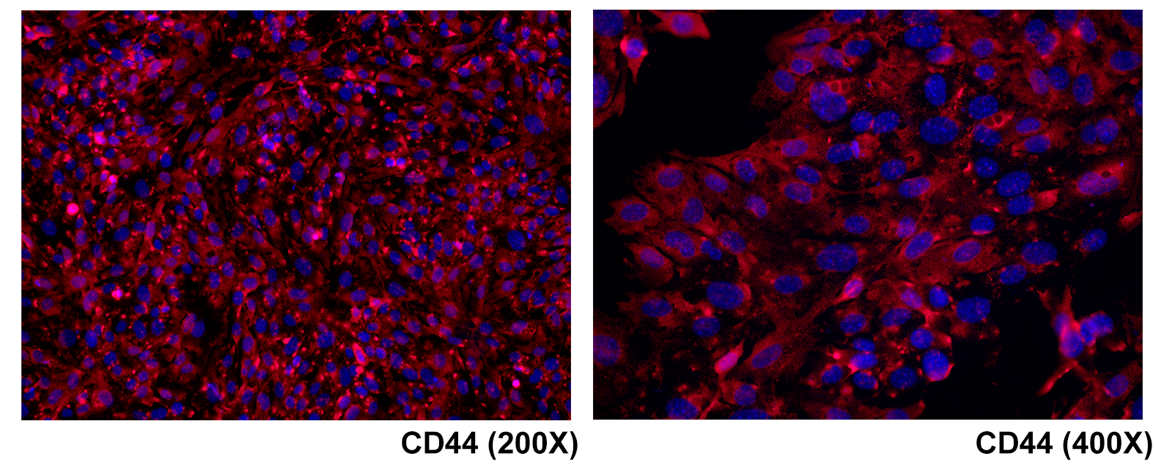


**Figure S2** **The targeted ability of P-ENVs to atherosclerotic plaques.** Representative fluorescence images of aortic roots after injecting with PBS, DiI-labeled ENVs or P-ENVs in vivo (red: ENVs or P-ENVs, blue: nuclei). Scale bar = 150 um.

**Figure S3 The expression of ICAM-1 by foam cells.** (A) Western blot analysis and (B) quantification of ICAM-1 expression after treatment with PBS or ox-LDL in vitro. n = 3. All data are presented as mean ± SD (***P < 0.001).


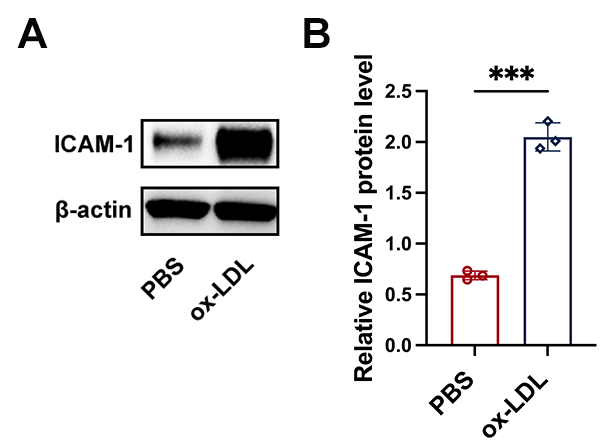


**Figure S4 Cellular uptake of DIL-oxLDL.** (A) Representative fluorescence images of DIL-oxLDL burden after incubation with DIL-oxLDL for 4 h. (B) Quantification of DIL-oxLDL fluorescence intensity in foam cells. (red: DIL-oxLDL, blue: nuclei). Scale bar = 20 um. n = 6. All data are presented as mean ± SD.


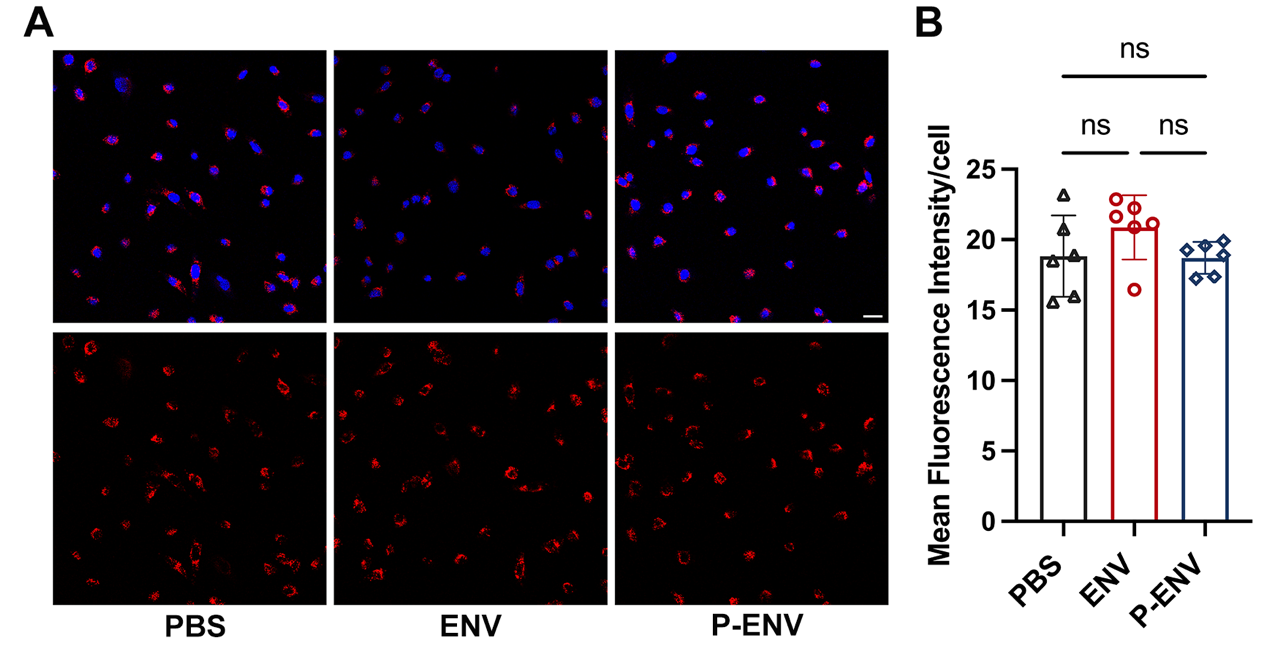

Supplement: Supplementary file 1 [file get_supplementary_file.php]
